# Supplementary material for: Dehydrogenation of ammonia-borane by cationic Pd(ii) and Ni(ii) complexes in a nitromethane medium: hydrogen release and spent fuel characterization
Source: Royal Society of Chemistry journal article supplement (doi:10.1039/c5dt00599j), 2015-01-01
Supplement: c5dt00599j1.pdf [file c5dt00599j1.pdf]

*Supporting Information*

**Dehydrogenation of Ammonia-Borane by Cationic Pd(II) and Ni(II) Complexes in Nitromethane Medium: Hydrogen Release and Spent Fuel Characterization**

Sung-Kwan Kim,<sup>a</sup> Sung-Ahn Hong,<sup>a</sup> Ho-Jin Son,<sup>\*a</sup> Won-Sik Han,<sup>d</sup> Artur Michalak,<sup>c</sup> Son-Jong Hwang,<sup>\*b</sup> and Sang Ook Kang<sup>\*a</sup>

<sup>a</sup>*Department of Advanced Materials Chemistry, Korea University, Sejong 339-700, Korea.*

<sup>b</sup>*Department of Chemistry, Seoul Women's University, Hwarang-ro 621, Seoul, Korea.*

<sup>c</sup>*Department of Theoretical Chemistry, Faculty of Chemistry, Jagiellonian University, R. Ingardena 3, 30-060 Kraków, Poland.*

<sup>d</sup>*Division of Chemistry and Chemical Engineering, California Institute of Technology, Pasadena, CA 91125, USA.*

**Table of Contents**

**Fig. S1.** X-ray photoelectron spectroscopy (XPS) of spent fuel

**Fig. S2** IR spectra of AB and the spent fuel

**Fig. S3** Experimental <sup>11</sup>B MAS NMR spectrum of spent fuels

**Fig. S4** Digestion procedures of spent fuels (CNH<sub>x</sub>BO<sub>y</sub>/PdNPs) remaining after AB dehydrogenation by Pd catalyst **1**

**Fig. S5** <sup>13</sup>C MAS and CPMAS NMR spectra of the precipitates produced from AB dehydrogenation

**Fig. S6** 1D <sup>11</sup>B MAS and 2D <sup>11</sup>B MQMAS NMR spectra of spent fuels

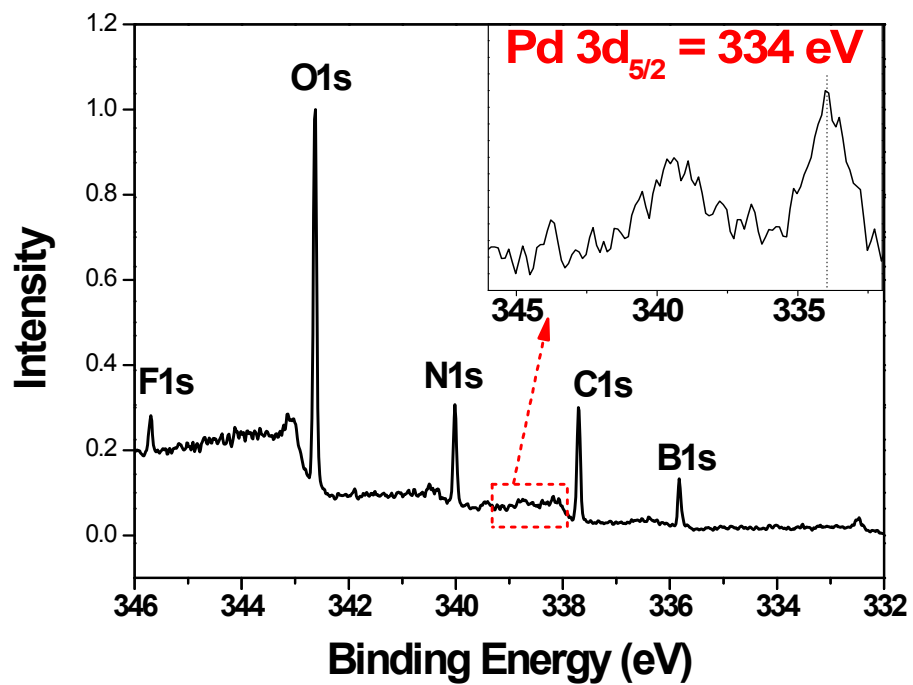

**Fig. S1** X-ray photoelectron spectroscopy (XPS) of spent fuel.

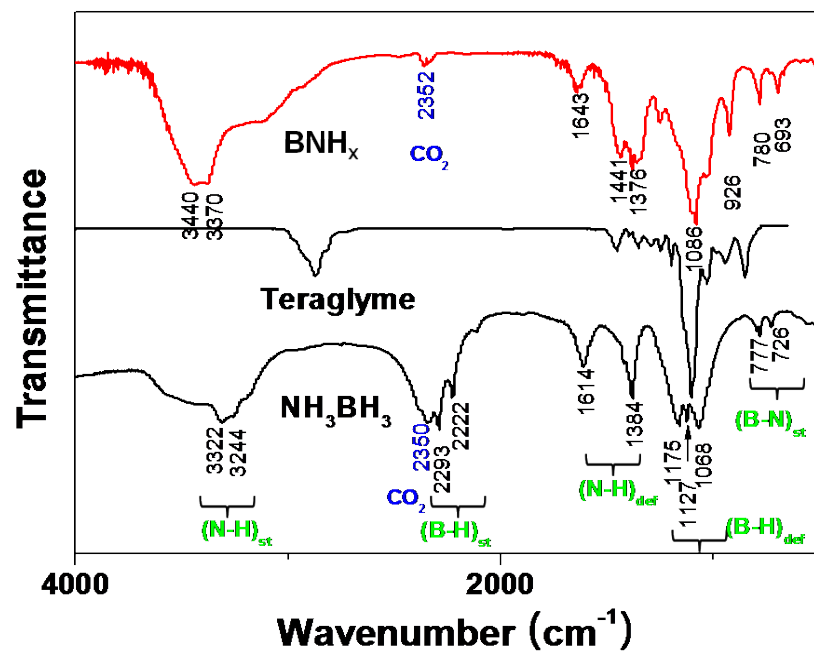

Fig. S2 IR spectra of AB and the spent fuel.

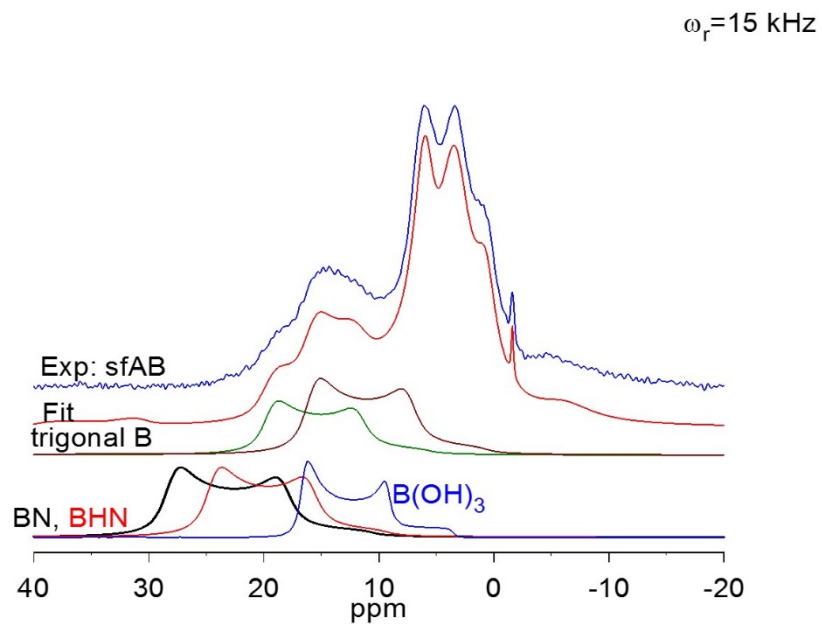

**Fig. S3** Experimental  $^{11}\text{B}$  MAS NMR spectrum of spent fuels and fit of the trigonal borons( $sp^2$  parts) (see Figure 1). Simulated spectra of BN,  $\text{BN}_2\text{H}$  using reported quadrupole parameters (ref), and experimental  $^{11}\text{B}$  MAS spectrum of boric acid are provided for reference.

### Digestion Procedures of Spent Fuels

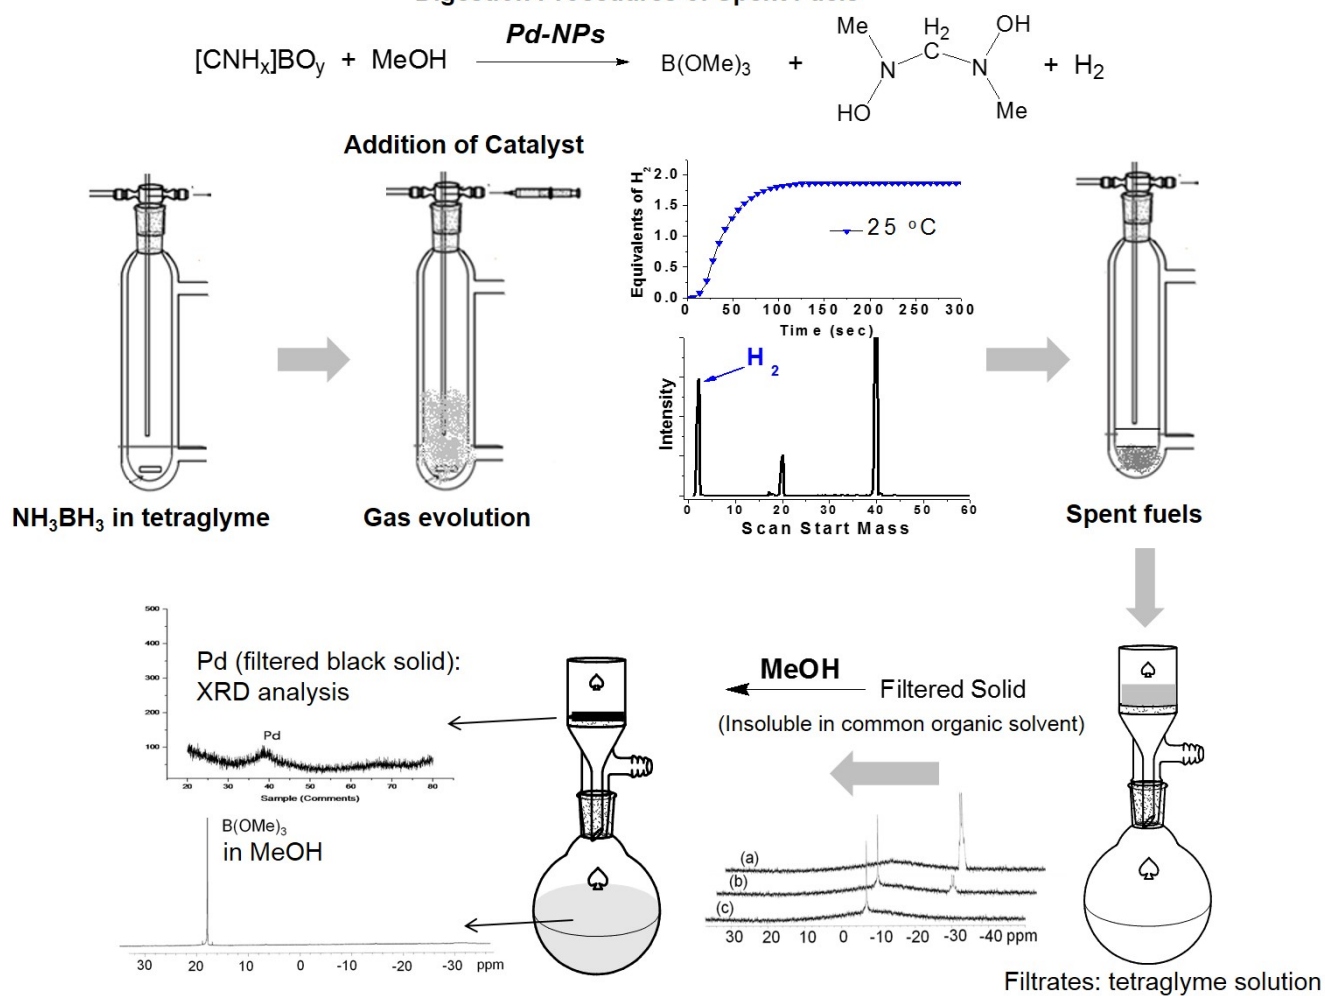

**Fig. S4** Digestion procedures of spent fuels ( $[\text{CNH}_x]\text{BO}_y/\text{PdNPs}$ ) remaining after AB dehydrogenation by Pd catalyst **1**.

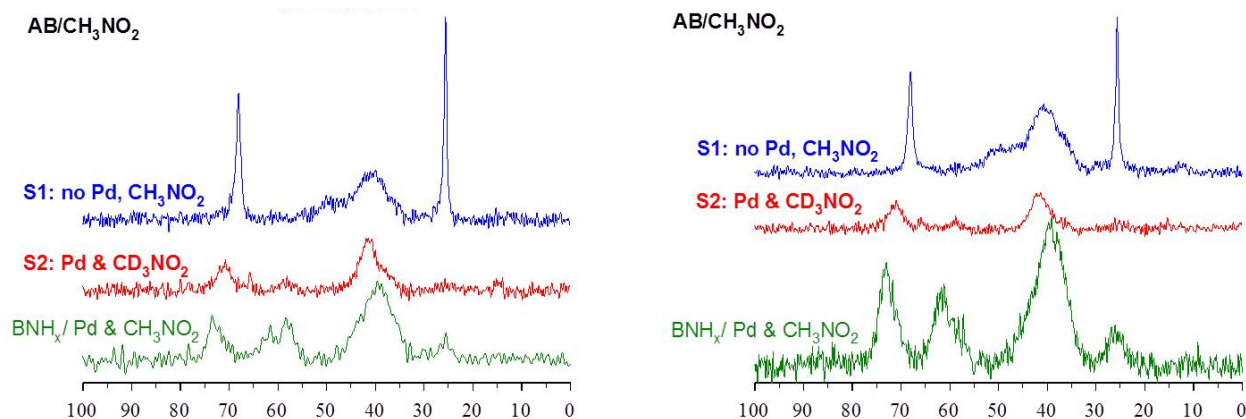

**Fig. S5**  $^{13}\text{C}$  MAS (left) and CPMAS NMR (right) spectra of the precipitates (S1, blue line) produced from AB dehydrogenation without **1** and TG, precipitates (S2, red line) generated with **1** in  $\text{CD}_3\text{NO}_2$  solvent, and AB spent fuels ( $[\text{CNH}_x]\text{BO}_y/\text{Pd}$  NPs, green line) generated with **1** and TG in  $\text{CH}_3\text{NO}_2$  solvent:  $^{13}\text{C}$  MAS and CPMAS spectra comparison also provide additional information. TG and Pd particles are missing in S1, and in  $^{13}\text{C}$  spectra present strong signal near 40 ppm while the two peaks at 60 and 75 ppm are missing as shown in Figure S5. The 40 ppm signal can then be attributed to the  $\text{MeNO}_2$  precipitated in the solids. The rest 60 and 75 ppm peaks are believed to be originated from the TG.

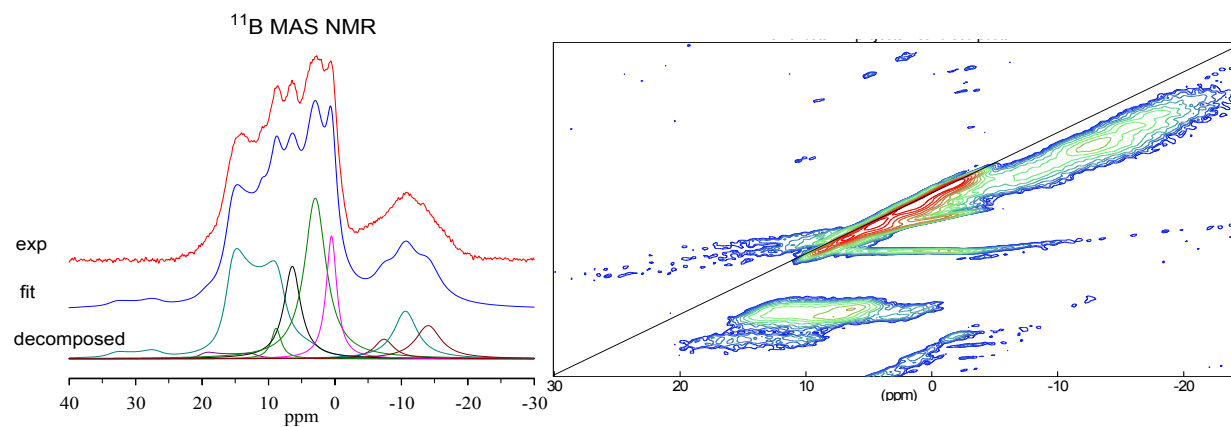

**Fig. S6** 1D <sup>11</sup>B MAS (left) and 2D <sup>11</sup>B MQMAS (right) NMR spectra of spent fuels from dehydrogenation of AB with MeNO<sub>2</sub> 80 °C
